# Supplementary material
Source: PubMed Central journal article supplement (PMC3690142)
Supplement: NIHMS443532-supplement-01.pdf [file NIHMS443532-supplement-01.pdf]

# A Clinical Risk Stratification Tool for Predicting Treatment Resistance in Major Depressive Disorder

## *Supplemental Information*

Figure S1. Consort diagram of sample derivation and analysis

Figure S2. Diagram of model development and testing

Table S1. List of variables considered for model inclusion

Table S2. Comparison of subjects included in modeling analysis with those censored from analysis

Table S3. Comparison of subjects between 3 modeling cohorts

Table S4. Additional model performance measures

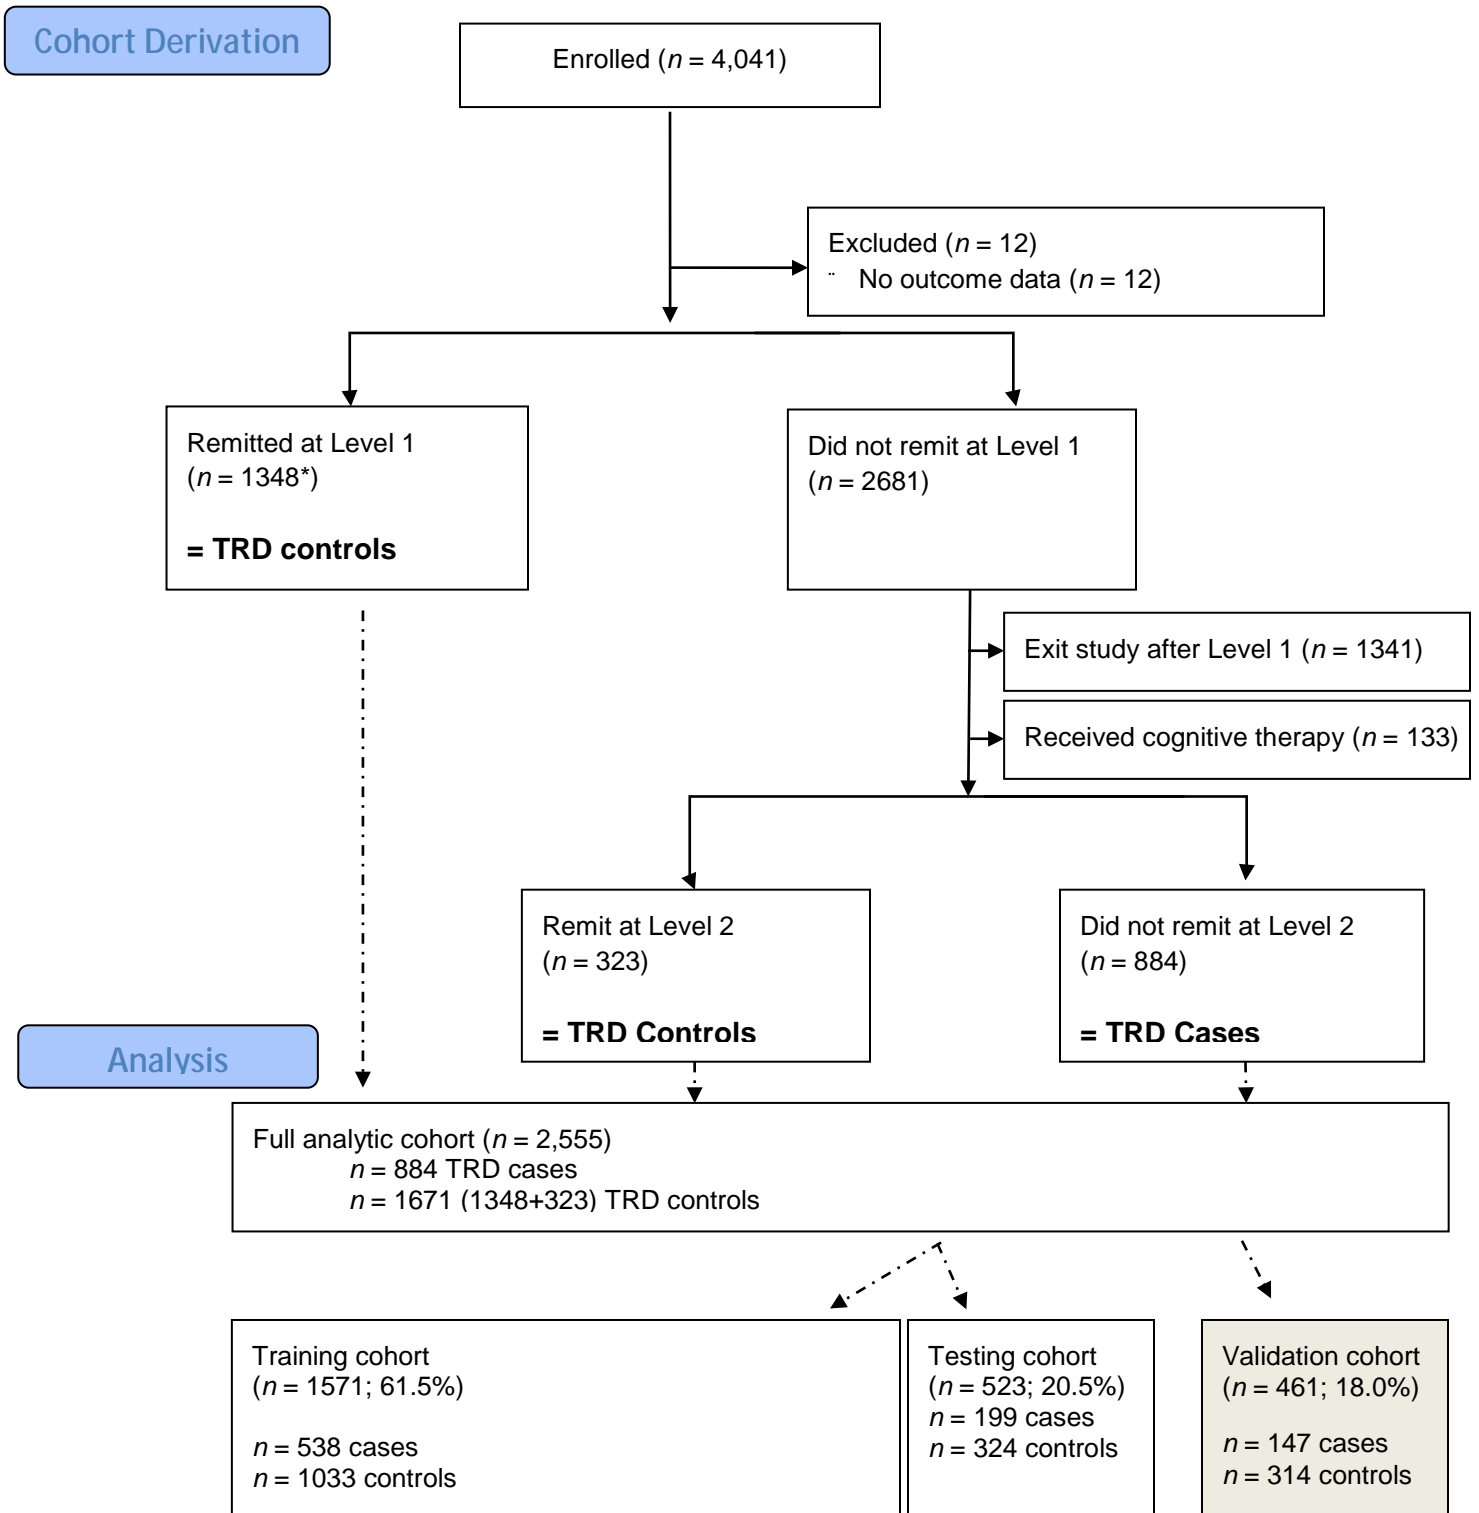

**Figure S1.** CONSORT diagram of sample derivation and analysis. \*includes subjects who remit but enter Level 2 ( $n = 97$ ). TRD, treatment-resistant depression.

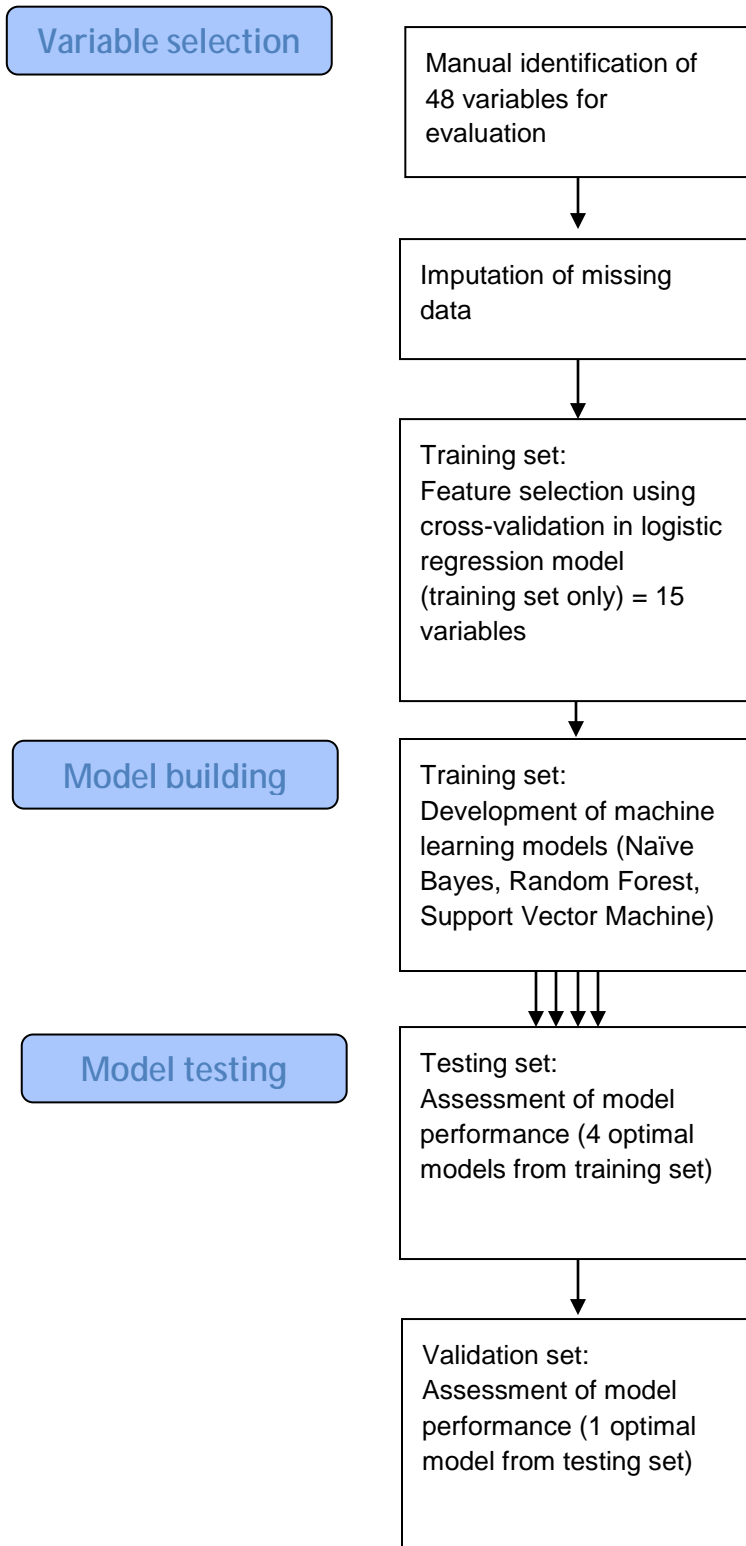

Figure S2. Diagram of model development and testing

**Table S1.** List of variables considered for model inclusion

| <b>Category</b>                       | <b>Variables</b>                                                                                                                        | <b>Source</b>                                                 |
|---------------------------------------|-----------------------------------------------------------------------------------------------------------------------------------------|---------------------------------------------------------------|
| Depression symptoms                   | QIDS-SR items, QIDS-SR total score, perimenstrual worsening                                                                             | QIDS-SR, psychiatric history form*                            |
| Sociodemographic features             | Age, sex, years of education, marital status (current, lifetime), ethnicity (white vs other, black vs other), race, home ownership      | Enrollment demographic form*                                  |
| Psychiatric comorbidity               | Individual DSM-IV axis I diagnoses, total axis I diagnoses, 1+ psychotic symptom from PDSQ, 1+ manic symptom from PDSQ                  | PDSQ                                                          |
| Illness course features and stressors | Recurrence, duration of current episode, onset age, witnessed trauma (lifetime), experienced trauma (lifetime), family impact (current) | Psychiatric history form*, PDSQ, enrollment demographic form* |

QIDS-SR, Quick Inventory of Depressive Symptoms; PDSQ, Psychiatric Diagnostic Symptom Questionnaire.

\* Variable recorded by clinician but readily assessed by patient self-report.

**Table S2.** Comparison of subjects included in modeling analysis with those censored from analysis

| Feature                   | Included<br>( <i>n</i> = 2555) |          | Censored<br>( <i>n</i> = 1486) |          | Comparison          |                |
|---------------------------|--------------------------------|----------|--------------------------------|----------|---------------------|----------------|
|                           | pct                            | <i>n</i> | pct                            | <i>n</i> | $\chi^2$            | <i>p</i> value |
| Sex (male)                | 39.4%                          | 1006     | 33.8%                          | 503      | 12.26               | <0.001         |
| Race (White)              | 82.1%                          | 2097     | 72.7%                          | 1080     | 49.35               | <0.001         |
| Race (African-American)   | 15.7%                          | 402      | 24.0%                          | 357      | 42.33               | <0.001         |
| Ethnicity (Hispanic)      | 12.0%                          | 306      | 13.5%                          | 201      | 2.06                | 0.152          |
| Primary care setting      | 37.8%                          | 965      | 41.0%                          | 610      | 4.25                | 0.039          |
| Currently married         | 35.1%                          | 897      | 29.3%                          | 435      | 14.47               | <0.001         |
|                           | mean                           | SD       | mean                           | SD       | <i>t</i> -statistic | <i>p</i> value |
| Age (years)               | 41.32                          | 13.04    | 40.34                          | 13.65    | 2.26                | 0.024          |
| Baseline QIDS-SR          | 15.12                          | 4.39     | 15.93                          | 4.24     | -5.74               | <.001          |
| Education (years)         | 13.66                          | 3.21     | 13.08                          | 3.19     | 5.53                | <.001          |
| Episode duration (months) | 25.05                          | 53.39    | 25.21                          | 51.00    | -0.09               | 0.925          |
| Comorbid axis 1 diagnoses | 1.28                           | 1.60     | 1.68                           | 1.78     | -7.28               | <.001          |

pct, percent; QIDS-SR: Inventory of Depressive Symptomatology Self-Report (16-item).

**Table S3.** Comparison of subjects between 3 modeling cohorts

| Feature                   | Training<br>( <i>n</i> = 1571) |          | Testing<br>( <i>n</i> = 523) |          | Validation<br>( <i>n</i> = 461) |          | Comparison |                |
|---------------------------|--------------------------------|----------|------------------------------|----------|---------------------------------|----------|------------|----------------|
|                           | pct                            | <i>n</i> | pct                          | <i>n</i> | pct                             | <i>n</i> | $\chi^2$   | <i>p</i> value |
| Sex (male)                | 38.9%                          | 611      | 39.6%                        | 207      | 40.8%                           | 188      | 0.54       | 0.76           |
| Race (White)              | 81.9%                          | 1286     | 83.0%                        | 434      | 81.8%                           | 377      | 0.37       | 0.83           |
| Race (African-American)   | 15.8%                          | 248      | 15.9%                        | 83       | 15.4%                           | 71       | 0.05       | 0.98           |
| Ethnicity (Hispanic)      | 10.8%                          | 169      | 11.7%                        | 61       | 16.5%                           | 76       | 11.16      | 0.004          |
| Primary care setting      | 38.8%                          | 610      | 42.3%                        | 221      | 29.1%                           | 134      | 20.08      | <.001          |
| Currently married         | 36.3%                          | 571      | 36.3%                        | 190      | 29.5%                           | 136      | 7.76       | 0.02           |
|                           | mean                           | SD       | mean                         | SD       | mean                            | SD       | ANOVA      | <i>p</i> value |
| Age (years)               | 41.52                          | 12.99    | 41.88                        | 12.79    | 40.01                           | 13.43    | 2.97       | 0.05           |
| Baseline QIDS-SR          | 15.15                          | 4.34     | 15.18                        | 4.38     | 14.94                           | 4.57     | 0.48       | 0.62           |
| Education (years)         | 13.58                          | 3.23     | 13.61                        | 3.12     | 13.96                           | 3.24     | 2.58       | 0.08           |
| Episode duration (months) | 22.46                          | 44.81    | 23.49                        | 50.85    | 35.66                           | 76.82    | 11.26      | <.001          |
| Comorbid axis 1 diagnoses | 1.32                           | 1.64     | 1.28                         | 1.56     | 1.14                            | 1.52     | 2.19       | 0.11           |

pct, percent; QIDS-SR: Inventory of Depressive Symptomatology Self-Report (16-item).

**Table S4.** Additional model performance measures

|                                        | Logistic Regression |       | Naïve Bayes |        | Random Forest |       | Support Vector |       |
|----------------------------------------|---------------------|-------|-------------|--------|---------------|-------|----------------|-------|
|                                        | Estimate            | SE    | Estimate    | SE     | Estimate      | SE    | Estimate       | SE    |
| <b>Training set (cross-validation)</b> |                     |       |             |        |               |       |                |       |
| Accuracy                               | 69.058              | 2.765 | 69.218      | 2.865  | 69.765        | 2.424 | 67.734         | 2.692 |
| Kappa                                  | 0.242               | 0.069 | 0.306       | 0.066  | 0.248         | 0.061 | 0.157          | 0.071 |
| RMSE                                   | 0.445               | 0.012 | 0.464       | 0.021  | 0.445         | 0.011 | 0.453          | 0.011 |
| Relative absolute error                | 86.758              | 2.390 | 79.077      | 4.221  | 88.391        | 2.226 | 91.991         | 2.465 |
| Root relative squared error            | 93.759              | 2.526 | 97.812      | 4.395  | 93.861        | 2.254 | 95.462         | 2.241 |
| SF entropy gain                        | 14.366              | 5.821 | -3.191      | 14.601 | 13.800        | 5.060 | 10.234         | 4.853 |
| SF mean entropy gain                   | 0.091               | 0.037 | -0.020      | 0.093  | 0.088         | 0.032 | 0.065          | 0.031 |
| <b>Testing set</b>                     |                     |       |             |        |               |       |                |       |
| Accuracy                               | 66.539              |       | 67.113      |        | 67.878        |       | 66.157         |       |
| Kappa                                  | 0.222               |       | 0.282       |        | 0.249         |       | 0.183          |       |
| RMSE                                   | 0.455               |       | 0.476       |        | 0.460         |       | 0.462          |       |
| RAE                                    | 87.117              |       | 80.783      |        | 89.184        |       | 89.876         |       |
| RRSE                                   | 93.375              |       | 97.837      |        | 94.391        |       | 94.959         |       |
| SF entropy gain                        | 50.077              |       | -12.115     |        | 42.721        |       | 39.071         |       |
| SF mean entropy gain                   | 0.096               |       | -0.023      |        | 0.082         |       | 0.075          |       |
| <b>Validation set</b>                  |                     |       |             |        |               |       |                |       |
| Accuracy                               | 70.282              |       |             |        |               |       |                |       |
| Kappa                                  | 0.198               |       |             |        |               |       |                |       |
| RMSE                                   | 0.438               |       |             |        |               |       |                |       |
| RAE                                    | 86.099              |       |             |        |               |       |                |       |
| RRSE                                   | 93.870              |       |             |        |               |       |                |       |
| SF entropy gain                        | 42.884              |       |             |        |               |       |                |       |
| SF mean entropy gain                   | 0.093               |       |             |        |               |       |                |       |

RAE, relative absolute error; RMSE, root mean squared error; RRSE, root relative squared error.
